# Supplementary material
Source: HighWire-hosted journal article supplement (http://www.qdcxjkg.com/highwire/filestream/113886/field_highwire_adjunct_files/0/ERJ-01398-2012_Disclosures.pdf)
Supplement: ERJ-01398-2012_Disclosures.pdf [file ERJ-01398-2012_Disclosures.pdf]

**A.P. Abernethy** has research funding from the US National Institutes of Health, US Agency for Healthcare Research and Quality, Robert Wood Johnson Foundation, Biovex, DARA, Helsinn, MiCo and Pfizer; these funds are all distributed to Duke University Medical Center to support research including salary support for A.P. Abernethy. In the last 2 years she has had nominal consulting agreements with or received honoraria (<US\$5,000 annually) from Novartis and Pfizer. Consulting with Bristol Meyers Squibb is pending in 2012, for role as Co-Chair of a Scientific Advisory Committee. In 2013, A.P. Abernethy will have paid leadership roles with American Academy of Hospice & Palliative Medicine (President-Elect) and Pillars4Life (Medical Director). She has corporate leadership responsibility in Advoset (an education company that has a contract with Novartis) and Orange Leaf Associates LLC (an IT development company).
